# Supplementary material for: MERIT40-dependent recruitment of tankyrase to damaged DNA and its implication for cell sensitivity to DNA-damaging anticancer drugs
Source: PubMed Central journal article supplement (PMC6254674; doi:10.18632/oncotarget.26312), 2018-11-09
Supplement: oncotarget-09-35844-s001.pdf [file oncotarget-09-35844-s001.pdf]

## MERIT40-dependent recruitment of tankyrase to damaged DNA and its implication for cell sensitivity to DNA-damaging anticancer drugs

### SUPPLEMENTARY MATERIALS

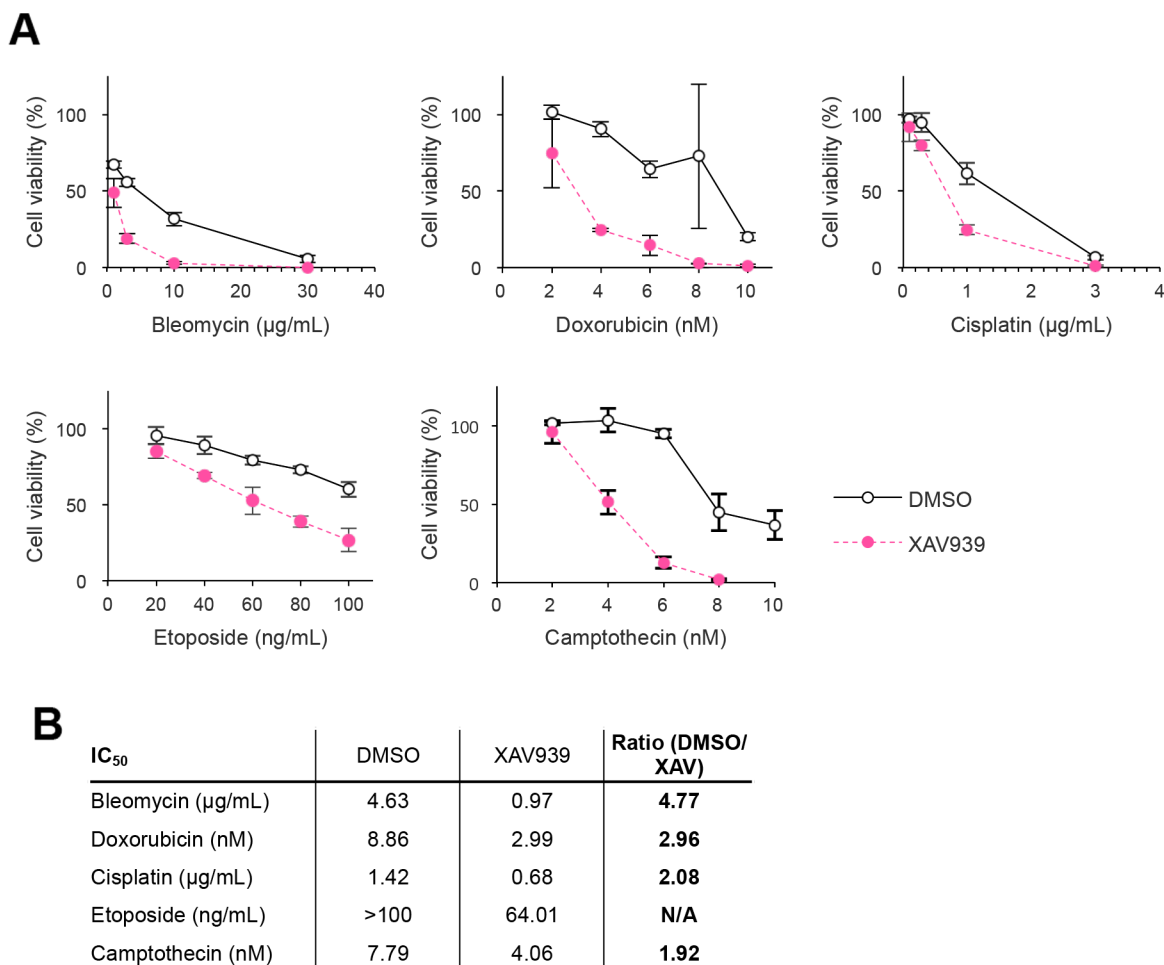

**Supplementary Figure 1: Tankyrase inhibitor XAV939 enhances the growth inhibitory effects of DNA-damaging anticancer drugs.** (A) A549 cells were treated with DNA-damaging anticancer drugs (bleomycin, doxorubicin, cisplatin, etoposide and camptothecin) at various concentrations in the presence or absence of 3 μM XAV939. After a 10-day cultivation, colonies were quantitated and normalized with the colony numbers from cells treated with either DMSO or XAV939 alone, in which cell viability was defined as 100%. Three independent experiments were performed and each experiment was performed in triplicate. (B) The IC<sub>50</sub> values of each drug treatment in A is shown in the table. The ratios of IC<sub>50</sub> values in the combination treatment of DNA-damaging anticancer drugs with XAV939 compared with the anticancer drugs with DMSO are shown in the right column.
